# Supplementary material for: Human neural stem cell transplantation improves cognition in a murine model of Alzheimer’s disease
Source: PubMed Central journal article supplement (PMC6170460; doi:10.1038/s41598-018-33017-6), 2018-10-03

# Supplementary Information

## Human neural stem cell transplantation improves cognition in a murine model of Alzheimer's disease

**Authors:** Lisa M. McGinley Ph.D.<sup>1</sup>, Osama N. Kashlan M.D.<sup>2</sup>, Elizabeth S. Bruno B.S.<sup>1</sup>, Kevin S. Chen M.D.<sup>2</sup>, John M. Hayes B.S.<sup>1</sup>, Samy R. Kashlan M.D.<sup>1</sup>, Julia Raykin Ph.D.<sup>3</sup>, Karl Johe Ph.D.<sup>4</sup>, Geoffrey G. Murphy Ph.D.<sup>5</sup> and Eva L. Feldman M.D. Ph.D.\*<sup>1</sup>

### **Affiliations:**

<sup>1</sup> Department of Neurology, University of Michigan, Ann Arbor, MI

<sup>2</sup> Department of Neurosurgery, University of Michigan, Ann Arbor, MI

<sup>3</sup> Department of Biomedical Engineering, Georgia Institute of Technology, Atlanta, GA

<sup>4</sup> Neuralstem, Inc., Germantown, MD

<sup>5</sup> Department of Molecular & Integrative Physiology, Molecular & Behavioral Neuroscience Institute, University of Michigan, Ann Arbor, MI

### **Address correspondence to:**

Eva L. Feldman, M.D. Ph.D., 5017 AAT-BSRB, 109 Zina Pitcher Place, Ann Arbor, MI 48109

Phone: 734-763-7274 / Fax: 734-763-7275

Email: [efeldman@umich.edu](mailto:efeldman@umich.edu)

Table S1: List of primary antibodies used for immunohistochemistry (IHC).

| <b>Antibody</b>            | <b>Vendor</b> | <b>Cat. #</b> | <b>Species</b> | <b>Dilution</b> |
|----------------------------|---------------|---------------|----------------|-----------------|
| <b>A<math>\beta</math></b> | Abcam         | Ab10148       | Rabbit         | 1:1500          |
| <b>ChAT</b>                | Millipore     | AB-144-P      | Rabbit         | 1:100           |
| <b>IBA-1</b>               | Wako          | 019-19741     | Rabbit         | 1:500           |
| <b>PSD95</b>               | Abcam         | Ab18258       | Rabbit         | 1:100           |
| <b>Synaptophysin</b>       | Abcam         | Ab32127       | Rabbit         | 1:500           |

**Supplementary Figure S1: Effect of NSC transplantation on synapse density, cholinergic neurons, and pro-inflammatory cytokines.** Representative IHC images (a) and quantification of IHC fluorescent intensity of synaptophysin (b), PSD-95 (c), and ChAT (d) in APP/PS1 mice at 29 weeks (17 weeks post-NSC/vehicle transplant). Synapse density and ChAT levels were unchanged by NSC transplantation, with no significant differences detected between groups (synaptophysin;  $p = 0.1297$ ; PSD-95;  $p = 0.4580$ ; ChAT;  $p = 0.1539$ ; NSC vs. sham; t-test). ELISA quantification on whole brain homogenate of IL-1 $\beta$  (e) and TNF- $\alpha$  (f) shows equivalent levels between treatment groups (IL-1 $\beta$ ;  $p = 0.4082$  and TNF- $\alpha$ ;  $p = 0.2115$ ; NSC vs. sham, Mann-Whitney test). Data are representative images or mean  $\pm$  SEM. Scale bar 100  $\mu$ m. Sample size: WT  $n=5$ , NSC  $n=10$ , and sham  $n=10$ .

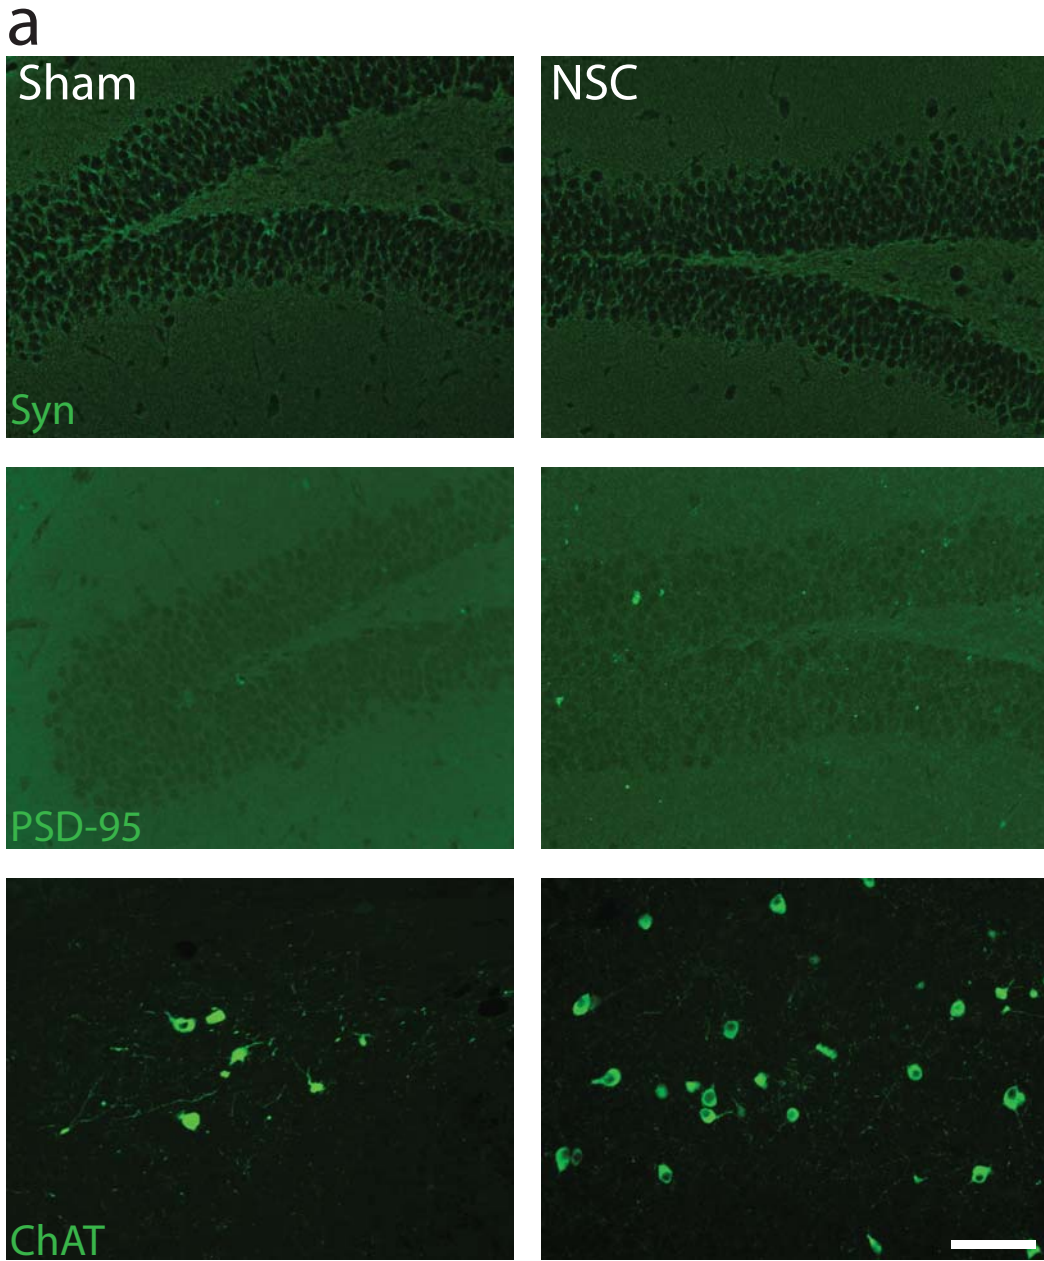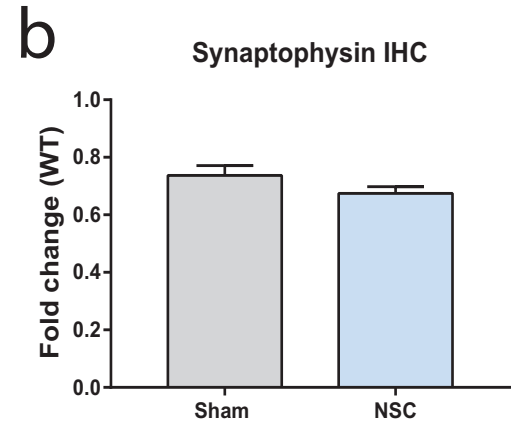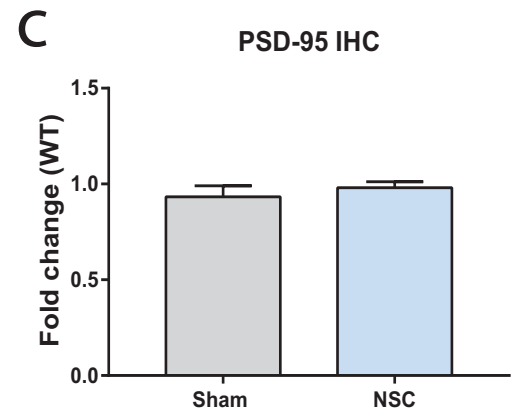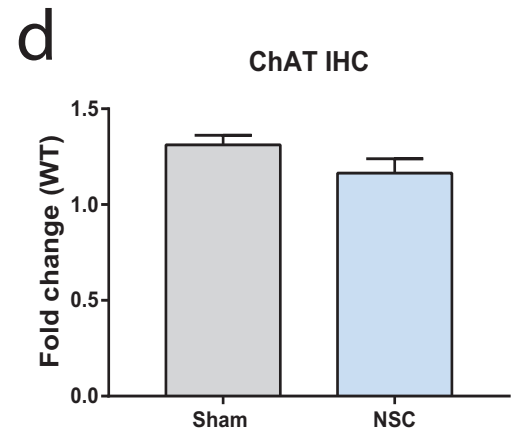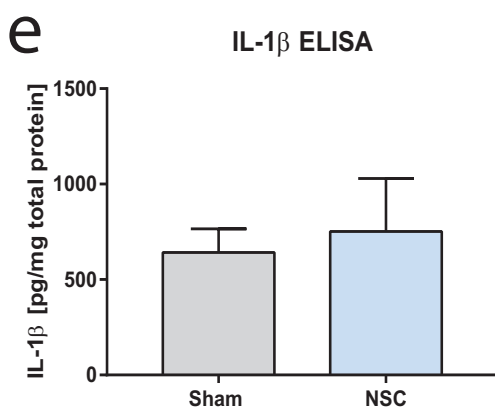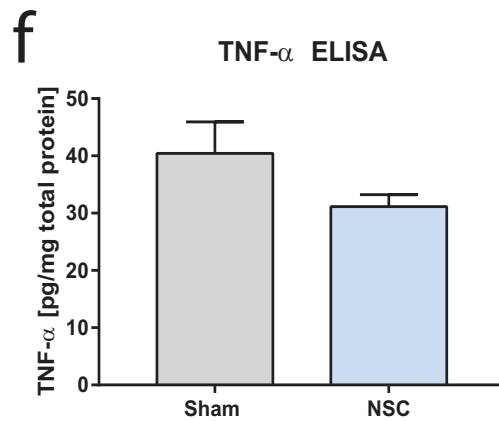

Supplement: 41598_2018_33017_MOESM1_ESM.pdf [file 41598_2018_33017_MOESM1_ESM.pdf]
